# Supplementary material for: Impact of stoma revision surgery on quality of life: the STICK-II retrospective cohort study
Source: Tech Coloproctol. 2026 May 26;30(1):121. doi: 10.1007/s10151-026-03347-z (PMC13388516; doi:10.1007/s10151-026-03347-z)
Supplement: Supplementary file 3 — Supplementary file3 (XLSX 103 KB) [file 10151_2026_3347_MOESM3_ESM.xlsx]

## Sheet: Supplementary 1
	Supplementary 1 Distribution of propensity scores

## Sheet: Supplementary 2
	Supplementary 2 Histogram total score stoma-QoL control group vs. revision group

## Sheet: Supplementary 3
	Supplementary 3 Baseline characteristics Parastomal Hernia
					Unadjusted					Adjusted
			Own* control		Revision*	Control*	ASMD***	p-value**		Revision*	Control*	ASMD**
			n = 8		n = 17	n = 216				n = 9	n = 93
	Distance						0.573					0.015
	Gender							0.041
		Male	3 (37.5)		6 (35.3)	131 (60.6)	0.531			(42.7)	(48.5)	0.118
		Female	5 (62.5)		11 (64.7)	85 (39.4)	0.531			(57.1)	(51.5)	0.118
	Age		67 ± 11		66 ± 15	70 ± 13		0.258
	Center							0.500
		Franciscus Gasthuis & Vlietland	6 (75.0)		8 (47.1)	98 (45.4)
		Erasmus Medical Center			7 (41.2)	68 (31.5)
		Maasstad	2 (25.0)		2 (11.8)	50 (23.1)
	Stoma type							0.452
		End colostomy	3 (37.5)		8 (47.1)	119 (55.1)	0.161			(57.1)	(56.3)	0.016
		End ileostomy	2 (25.0)		4 (23.5)	28 (13.0)	0.249			(21.4)	(21.8)	0.008
		Bricker urostomy	1 (12.5)		3 (17.6)	55 (25.5)	0.205			(21.4)	(20.2)	0.031
		Loop colostomy	1 (12.5)			4 (1.9)	0.143
		Loop ileostomy			2 (11.8)	8 (3.7)	0.250				(1.7)	0.051
		Urethrocutaneous stoma				2 (0.9)	0.100
		End colostomy & Bricker	1 (12.5)
		End ileostomy & Bricker
	Stoma indication							0.064
		Malignancy	4 (50.0)		4 (25.0)	109 (50.9)
		Colorectal	3 (75.0)		2 (50.0)	60 (55.0)
		Urological	1 (25.0)		2 (50.0)	38 (34.9)
		Gynaecological				7 (6.4)
		Other				4 (3.7)
		IBD	2 (25.0)		3 (18.8)	18 (8.4)
		Ulcerative colitis	2 (100.0)		1 (33.3)	14 (77.8)
		Crohn's disease			2 (66.7)	4 (22.2)
		Inflammation	1 (12.5)		1 (6.3)	28 (13.1)
		Diverticulitis	1 (100.0)		1 (100.0)	14 (50.0)
		Enterocutaneous fistula				10 ( 37.50
		Other				4 (14.3)
		Complication			2 (12.5)	24 (11.2)
		Anastomotic leak			2 (100.0)	12 (50.0)
		Perforation				5 (20.8)
		Other				7 (29.2)
		Excretion problems	1 (12.5)		5 (31.3)	20 (9.3)
		Fecal incontinence			1 (20.0)	5 (25.0)
		Urinary incontinence	1 (100.0)		1 (20.0)	3 (15.0)
		Constipation			2 (40.0)	2 (10.0)
		Other			1 (20.0)	10 (50.0)
		Obstruction				8 (3.7)
		Other			1 (6.3)	7 (33)
	Operation type							0.010
		Open	1 (12.5)		6 (46.2)	92 (47.2)	0.013			(57.1)	(48.1)	0.182
		Laparoscopic	3 (37.5)		4 (30.8)	33 (16.9)	0.184			(28.6)	(32.9)	0.101
		Robotic	4 (50.0)			57 (29.2)	0.301			(7.1)	(8.6)	0.061
		Laparoscopic converted			1 (7.7)	9 (4.6)	0.073			(7.1)	(8.8)	0.072
		Robotic converted				1 (0.5)	0.005
		Other			2 (15.4)	3 (1.5)	0.414				(1.7)	0.044
		Missing			4	21
	Surgical setting							0.855
		Acute	2 (25.0)		5 (33.3)	65 (30.8)
		Elective	6 (75.0)		10 (66.7)	142 (67.3)
		Semi-elective				4 (1.9)
		Missing			2	5
	ASA							0.807
		I	1 (20.0)		6 (75.0)	8 (5.6)
		II	2 (40.0)		2 (25.)	88 (62.0)
		III	2 (40.0)			41 (28.9)
		IV				5 (3.5)
		Missing	3		9	74
	Planned stoma placement		7 (87.5)		16 (94.1)	170 (80.2)		0.292
	Stoma place was marked		6 (75.0)		12 (80.0)	169 (78.2)		0.658
	Number of stoma leaks anually		15 ± 24		54 ± 107	15 ± 46		0.158
	Buldging of the stoma		6 (75.0)		10 (66.7)	92 (46.9)		0.141
		Missing	2		2	20
	Retraction of the stoma		1 (14.3)		2 (14.3)	18 (9.3)		0.544
		Missing	1		3	23
	Prolapse of the stoma		5 (71.4)		7 (43.8)	74 (37.6)		0.624
		Missing	1		1	19
	Shrinkage of the stoma				2 (11.8)	21 (11.5)		0.971
		Missing	2			33
	Skinproblems							0.086
		Never	1 (12.5)		2 (11.8)	45 (20.8)
		Seldom	3 (37.5)		3 (17.7)	55 (25.5)
		Sometimes	3 (37.5)		5 (29.4)	82 (38.0)
		Often	1 (12.5)		4 (23.5)	24 (11.1)
		Very often			3 (17.6)	10 (4.6)
	Time living with a stoma		44 ± 15		84 ± 41	48 ± 30		0.003
	Time between both stoma-QoL's		33 ± 6
	Time between placement and first revision		33 ± 29		31 ± 32
	Number of revision surgery's		1 ± 0		2 ± 1
	BMI		27.3 ± 3.7		26.9 ± 4,9	26.6 ± 5.0		0.869
		Missing			6	44
	Smoking							0.066
		Never	1 (12.5)		4 (25.0)	70 36.1)
		Quit smoking	4 (50.0)		6 (37.5)	95 (49.0)
		Smoking	3 (37.5)		6 (37.5)	29 (14.9)
		Missing			1	22
	Packyears		16 ± 12		25 ± 25	30 ± 24		0.672
		Missing	1		11	168
	Medical history
		Surgical operation	3 (37.5)		5 (29.4)	43 (20.0)		0.356
		Urological opeation				12 (5.6)		0.317
		Gynaecological operation			2 (11.8)	22 (10.2)		0.842
		Malignacy	1 (12.5)		1 (5.9)	32 (14.8)		0.306
		Gastroenterological			2 (11.8)	21 (9.8)		0.791
		Cardiovascular disease			6 (35.3)	60 (27.9)		0.516
		Diabetes			2 (11.8)	32 (15.0)		0.721
		Pulmonal	1 (12.5)		1 (5.9)	11 (5.1)		0.891
		Dermatological			2 (11.8)	4 (1.9)		0.013
		Neurological			2 (11.8)	17 (7.9)		0.577
		Reumatological	1 (12.5)			6 (2.8)		0.485
		Substance abuse				2 (0.9)		0.690
	* Data presented as n (%) or mean ± SD. Time in months.
	** p-values are two-sided. For dichotomous variables χ2-test was performed and for continuous vriables independent samples T-test
	*** ASMD = Absolute Standardized Mean Difference

## Sheet: Supplementary 4
	Distance
	Female
	Male
	ST Bricker
	ST End colostomy
	ST End ileostomy
	ST Loop colostomy
	ST Loop ileostomy
	ST uretherocutaneous
	OT Laparoscopic
	OT Laparoscopic converted
	OT Open
	OT Other
	OT Robotic
	OT Robotic converted
		0.0	0.2	0.4	0.6	0.8	1.0
	Supplementary 4 Absolute standardized mean difference plot for parastomal hernia
	ST = stoma type and OT = operation type

## Sheet: Supplementary 5
	Supplementary 5 Distribution of the propensity scores for parastomal hernia

## Sheet: Supplementary 6
	Supplementary 6 Histogram total score stoma-QoL control group vs. revision group for parastomal hernia

## Sheet: Supplementary 7
	Supplementary 7 Stoma-QoL for different stoma types control group vs. revision group
	Control group shown in red and revision group shown in gray
